# Supplementary material for: Excellent impact strength of ethylene-methyl acrylate copolymer toughened polycarbonate
Source: Royal Society of Chemistry journal article supplement (doi:10.1039/c5ra18024d), 2015-01-01
Supplement: c5ra18024d1.pdf [file c5ra18024d1.pdf]

## **SUPPLEMENTARY INFORMATION**

**TABLE S1:** Properties of EMA (Ethylene-methyl acrylate copolymer)

| <b>Properties</b>             | <b>Value</b>                                     |
|-------------------------------|--------------------------------------------------|
| Composition                   | 30 % by weight methyl acrylate comonomer content |
| Density                       | 0.95 g/cm <sup>3</sup>                           |
| Melt Flow Rate (190°C/2.16kg) | 3 g/10 min                                       |
| Melting Point (DSC)           | 85°C                                             |

**TABLE S2:** Composition of PC/EMA blends

| <b>Sample Designation</b> | <b>Polycarbonate (%)</b> | <b>Ethylene-methyl acrylate (%)</b> |
|---------------------------|--------------------------|-------------------------------------|
| PC                        | 100                      | 0                                   |
| PCE1                      | 99                       | 1                                   |
| PCE3                      | 97                       | 3                                   |
| PCE5                      | 95                       | 5                                   |
| PCE10                     | 90                       | 10                                  |
| PCE20                     | 80                       | 20                                  |
| PCE30                     | 70                       | 30                                  |

**TABLE S3: Temperature profile**

| <b>Zone 1</b> | <b>Zone 2</b> | <b>Zone 3</b> | <b>Zone 4</b> | <b>Zone 5</b> |
|---------------|---------------|---------------|---------------|---------------|
| 140°C         | 200°C         | 230°C         | 240°C         | 250°C         |
| <b>Zone 6</b> | <b>Zone 7</b> | <b>Zone 8</b> | <b>Zone 9</b> | <b>Die</b>    |
| 255°C         | 260°C         | 265°C         | 270°C         | 270°C         |

**TABLE S4: Mechanical properties of PC/EMA blends**

| <b>Sample Designation</b> | <b>Composition PC/EMA (wt%)</b> | <b>Tensile Strength at yield (MPa)</b> | <b>Tensile Modulus (MPa)</b> | <b>Elongation at Break (%)</b> | <b>Izod Impact Strength (J/m)</b> |
|---------------------------|---------------------------------|----------------------------------------|------------------------------|--------------------------------|-----------------------------------|
| PC                        | 100                             | 45.2±0.7                               | 236.53±12.01                 | 30.70±3.3                      | 68.49±3.0                         |
| PCE1                      | 99/1                            | 43.3±1.3                               | 224.32±12.9                  | 33.56±3.5                      | 195.03±4.6                        |
| PCE3                      | 97/3                            | 42.1±1.5                               | 213.23±14.8                  | 37.91±9.9                      | 318.73±7.1                        |
| PCE5                      | 95/5                            | 40.6±1.4                               | 193.36±12.7                  | 43.45±12.2                     | 329.11±10.0                       |
| PCE10                     | 90/10                           | 34.6±2.4                               | 181.60±13.0                  | 98.72±18.4                     | 334.93±12.6                       |
| PCE20                     | 80/20                           | 27.9±1.9                               | 169.48±12.5                  | 101.62±11.1                    | 338.30±16.1                       |
| PCE30                     | 70/30                           | 21.3±1.0                               | 146.41±13.2                  | 103.46±11.1                    | 377.80±26.2                       |

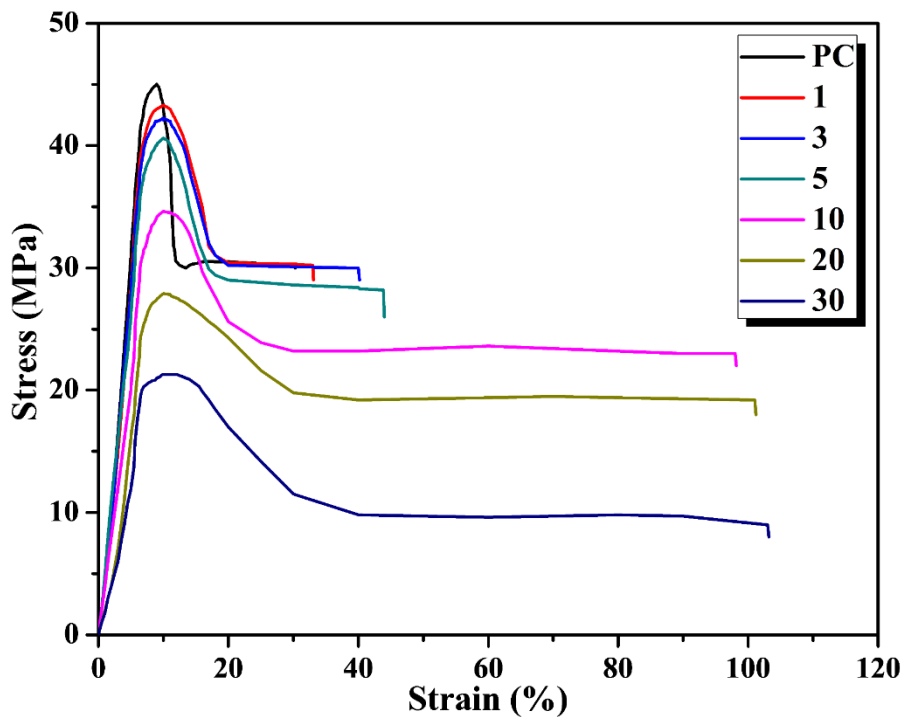

Fig. S1 Stress-Strain curves of PC, 1-30wt% PC/EMA blends.

TABLE S5: Morphological Parameters from SEM analysis

| Sample Designation | Number-average diameter of domain $D_n$ ( $\mu\text{m}$ ) | Weight-average diameter of domain $D_w$ ( $\mu\text{m}$ ) |
|--------------------|-----------------------------------------------------------|-----------------------------------------------------------|
| PCE1               | 0.103                                                     | 0.107                                                     |
| PCE3               | 0.121                                                     | 0.143                                                     |
| PCE5               | 0.138                                                     | 0.192                                                     |
| PCE10              | 0.214                                                     | 0.478                                                     |
| PCE20              | 0.409                                                     | 0.834                                                     |

**TABLE S6:** Values of Stress-concentration Parameters ( $S$ ,  $S'$  and  $K_b$ ) in PC/EMA blends

| Sample Designation | wt% EMA | Volume Fraction of EMA ( $\phi_1$ ) | $S$   | $S'$  | $K_b$ |
|--------------------|---------|-------------------------------------|-------|-------|-------|
| PC                 | 0       | 0                                   | 0     | 0     | 0     |
| PCE1               | 1       | 0.01                                | 0.969 | 1.021 | 0.862 |
| PCE3               | 3       | 0.03                                | 0.959 | 1.057 | 0.725 |
| PCE5               | 5       | 0.06                                | 0.957 | 1.071 | 0.652 |
| PCE10              | 10      | 0.11                                | 0.854 | 1.013 | 1.045 |
| PCE20              | 20      | 0.24                                | 0.816 | 1.016 | 0.984 |
| PCE30              | 30      | 0.34                                | 0.712 | 0.94  | 1.088 |
| Mean               | --      | --                                  | 0.878 | 1.02  | 0.893 |

### Melt Flow Index (MFI)

Melt flow index of neat PC, neat EMA and different compositions of PC/EMA blend measured by ASTM D1238 standard. The melt flow behaviour of neat PC, neat EMA and PC/EMA blends of different compositions are evaluated and represented in Fig. S2.

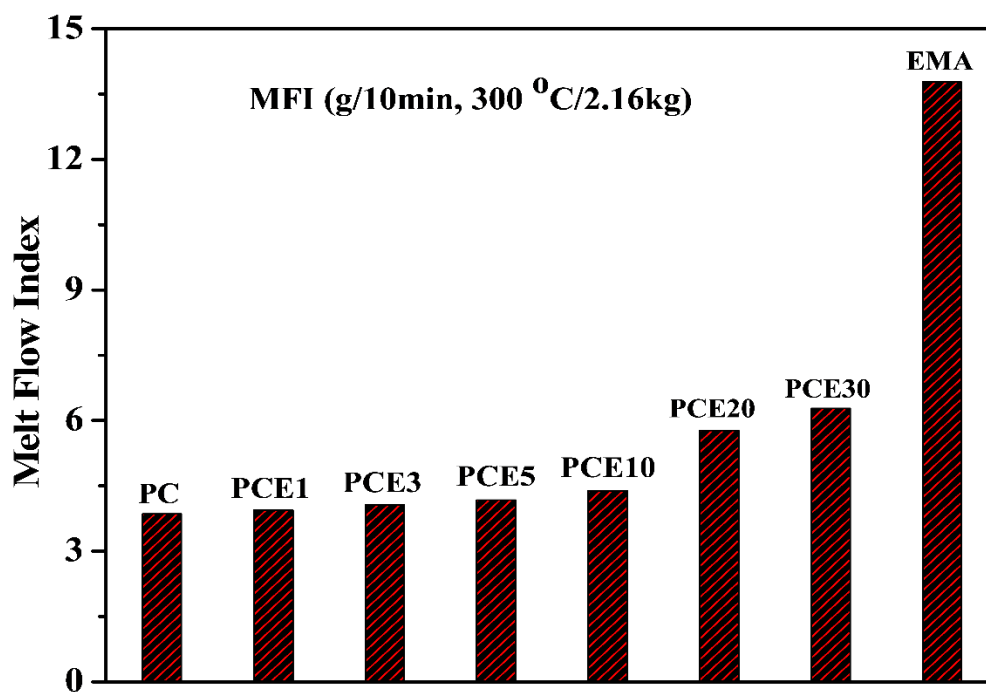

**Fig. S2** MFI measurement of PC, 1-30wt% PC/EMA blends and EMA.

Incorporation of EMA in PC results in a decreased ratio of plastic to rubbery phase. The addition of EMA in PC matrix increased the flow rate. As expected the MFI values of PC/EMA blends increased with increasing in percentage of EMA in polymer blend. MFI was also calculated from the rule of mixture and there is a good agreement between experimental and theoretical values.
